# Supplementary material
Source: PubMed Central journal article supplement (PMC6480393)
Supplement: NIHMS1018501-supplement-Supp.pdf [file NIHMS1018501-supplement-Supp.pdf]

# Supplemental Information

## NONAUTHOR CONTRIBUTORS

Pankaj B. Agrawal, Alan H. Beggs,  
Wendi N. Betting, Ozge Ceyhan-  
Birsoy, Kurt D. Christensen, Dmitry  
Dukhovny, Shawn Fayer, Leslie  
A. Frankel, Casie A. Genetti, Chet  
Graham, Robert C. Green, Amanda  
M. Gutierrez, Maegan Harden, Ingrid  
A. Holm, Joel B. Krier, Matthew S.  
Lebo, Harvey L. Levy, Xingquan Lu,  
Kalotina Machini, Amy L. McGuire,  
Jaclyn B. Murry, Medha Naik, Tiffany  
T. Nguyen, Richard B. Parad, Hayley  
A. Peoples, Stacey Pereira, Devan  
Petersen, Uma Ramamurthy, Vivek  
Ramanathan, Heidi L. Rehm, Amy  
Roberts, Jill O. Robinson, Serguei  
Roumiantsev, Talia S. Schwartz, Tina  
K. Truong, Grace E. VanNoy, Susan E.  
Waisbren, Timothy W. Yu
